# Supplementary material
Source: PubMed Central journal article supplement (PMC3690989)

SUPPLEMENTARY DATA

FIG. S1. Water distribution measured in the soil after withholding water supply for the evaluation of shoot biomass and plant survival rates. The soil media in the hydrostimulated chambers were divided into 32 zones. Water content (% v/v) in each zone was measured at time zero and 2, 4, 6, 8, and 10 d after hydrostimulation. The bottom bar shows the water content in a greyscale, which corresponds to the water distribution maps shown above. The arrow (g) indicates the direction of the gravitational force. Data show the means  $\pm$  s.e. ( $n = 3$ ).

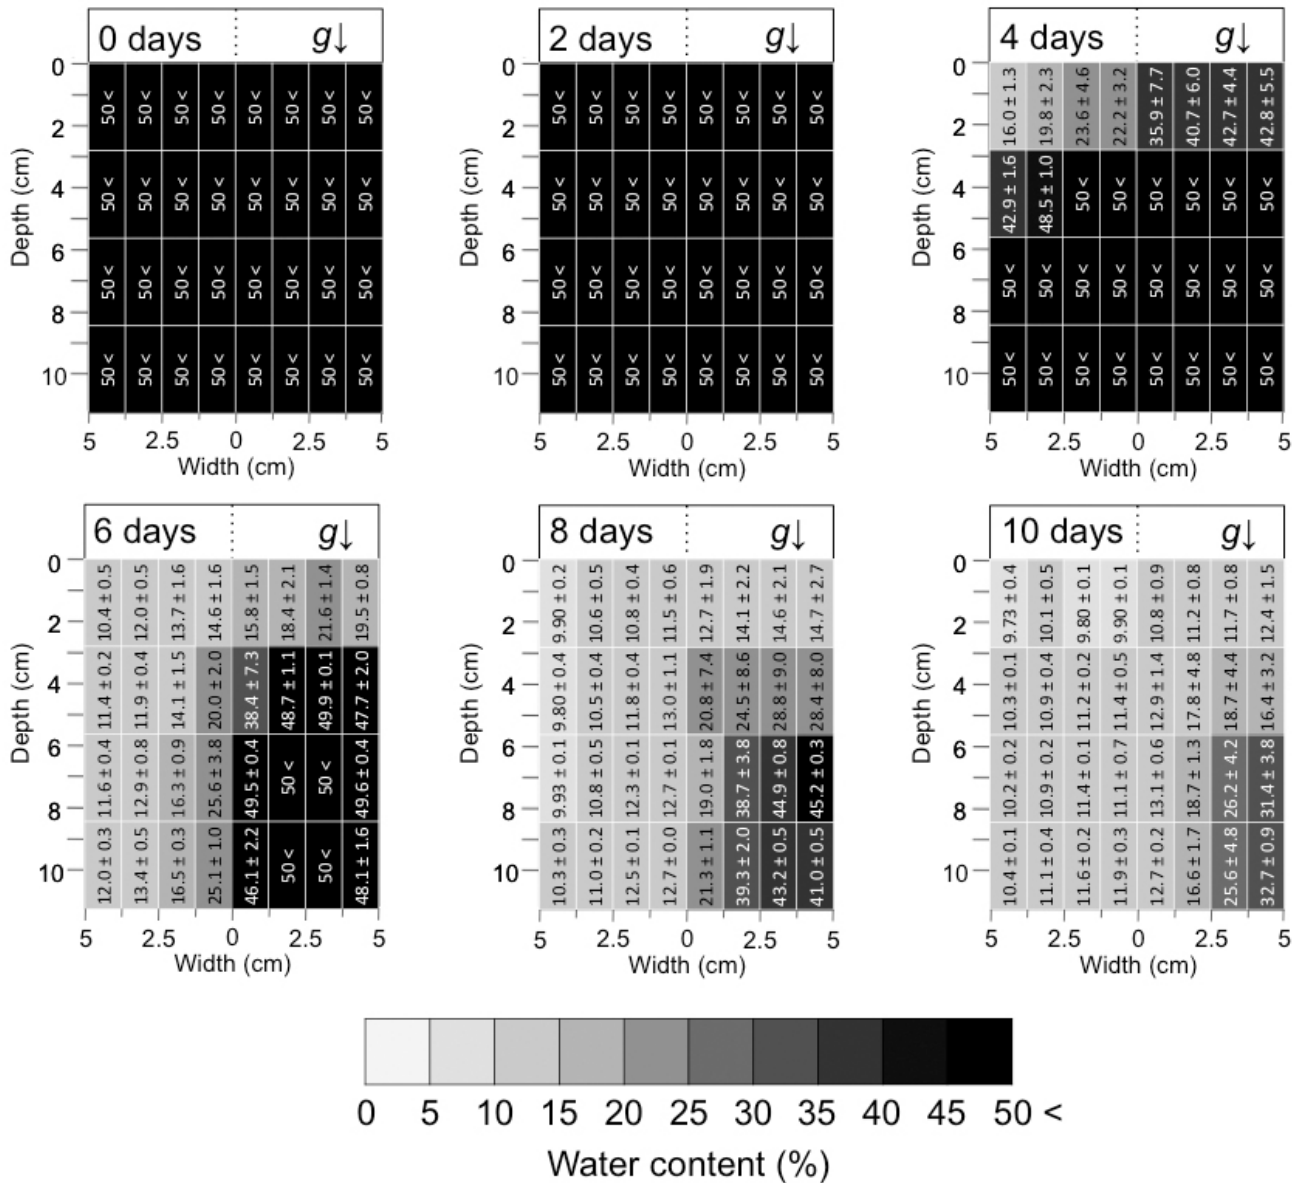

Supplement: supp_mct098_mct098supp.pdf [file supp_mct098_mct098supp.pdf]
